# Supplementary material
Source: PubMed Central journal article supplement (PMC6452206)
Supplement: hmg-supplemental_combined_ddy429.pdf [file hmg-supplemental_combined_ddy429.pdf]

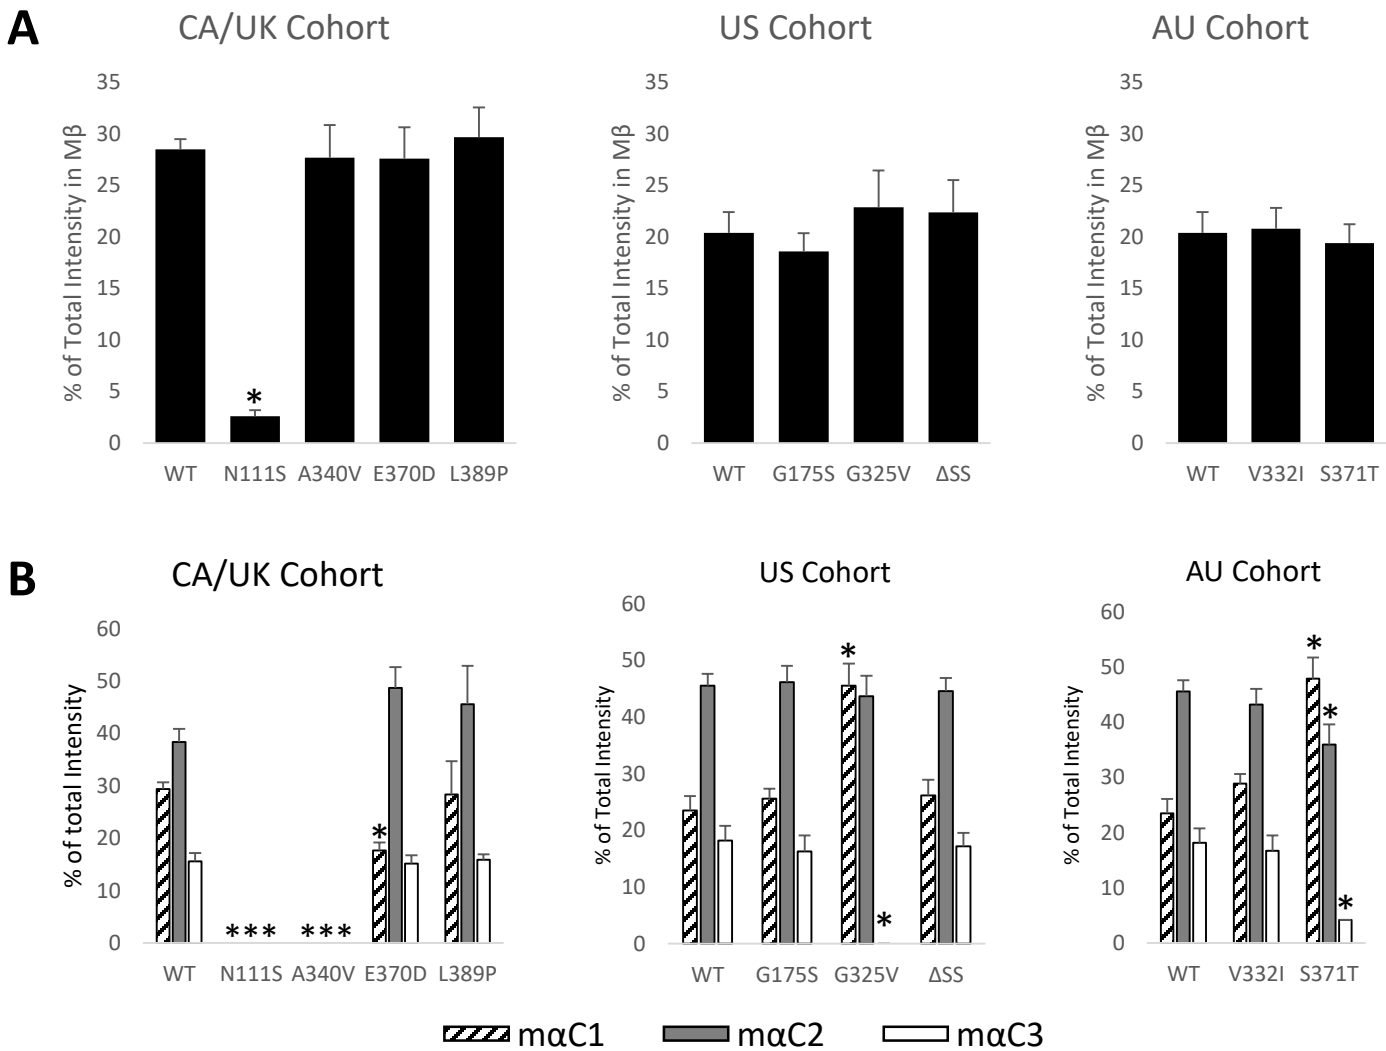

**Supplemental Figure 1. Quantification of Western Blots (A)** Quantification of the amount of mature Mβ processing form relative to the immature P1 form in the western blots from Figure 2. Relative amounts were quantified for three biological replicates using ImageJ. Significantly different (student's 2-tailed T-test [ $p < 0.05$ ]) relative amount of Mβ was detected only for p.N111S which showed a significant processing deficit. **(B)** Quantification of the relative amounts of μαC1 (hatched bar), μαC2 (solid grey bar), or μαC3 (white bar) relative to the immature μα form in the western blots from Figure 2C. Relative amounts were quantified for three biological replicates using ImageJ. Significantly different (student's 2-tailed T-test [ $p < 0.05$ ]) relative amounts of μαC1, μαC2, or μαC3 were detected for p.E370D, p.G325V, p.S371T.

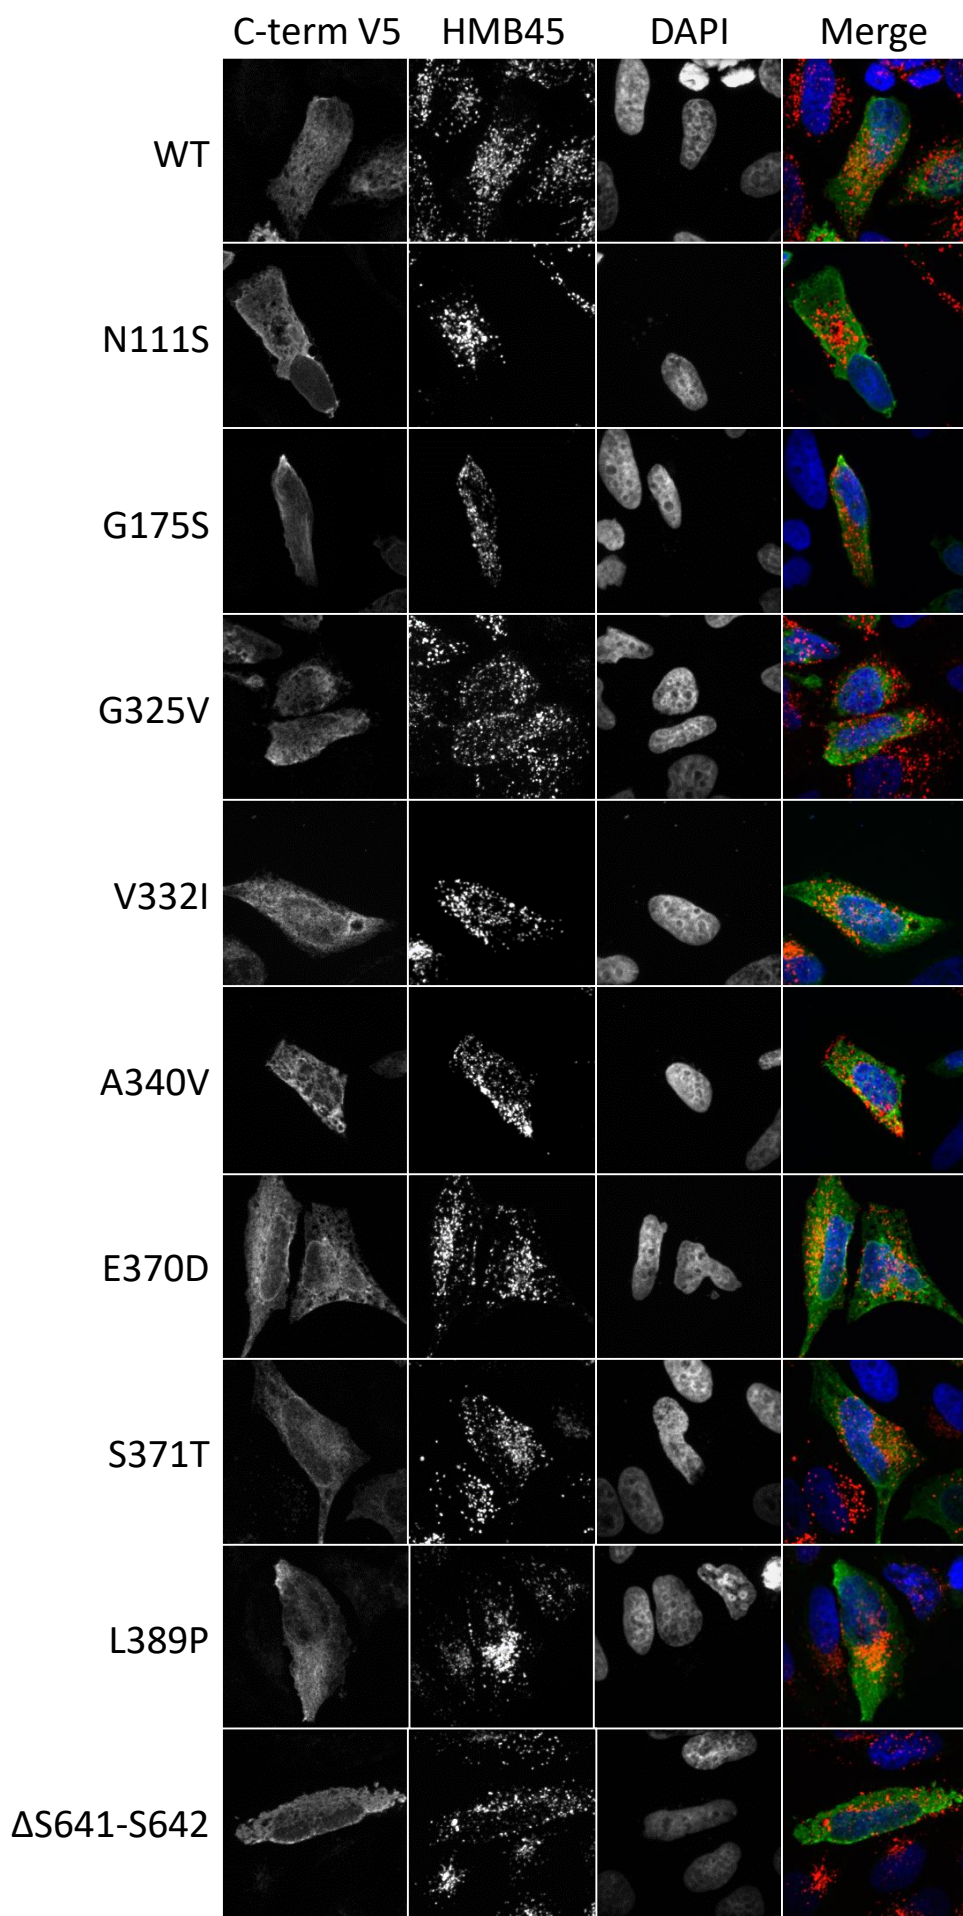

**Supplemental Figure 2. Immunofluorescence microscopy shows that PMEL variants appear to traffic normally (A)** V5-tagged PMEL (green) appears mesh like suggesting ER localization in all variants. No differences between PMEL-WT and any PDS/PG associated variants were observed. HMB45-reactive PMEL (red) appears correctly as cytoplasmic puncta suggesting correct trafficking to a subset of endosomes and no clear retention in the Golgi. The same pattern was observed for all variants suggesting no defects in trafficking. DAPI staining was used to show the nucleus (blue).

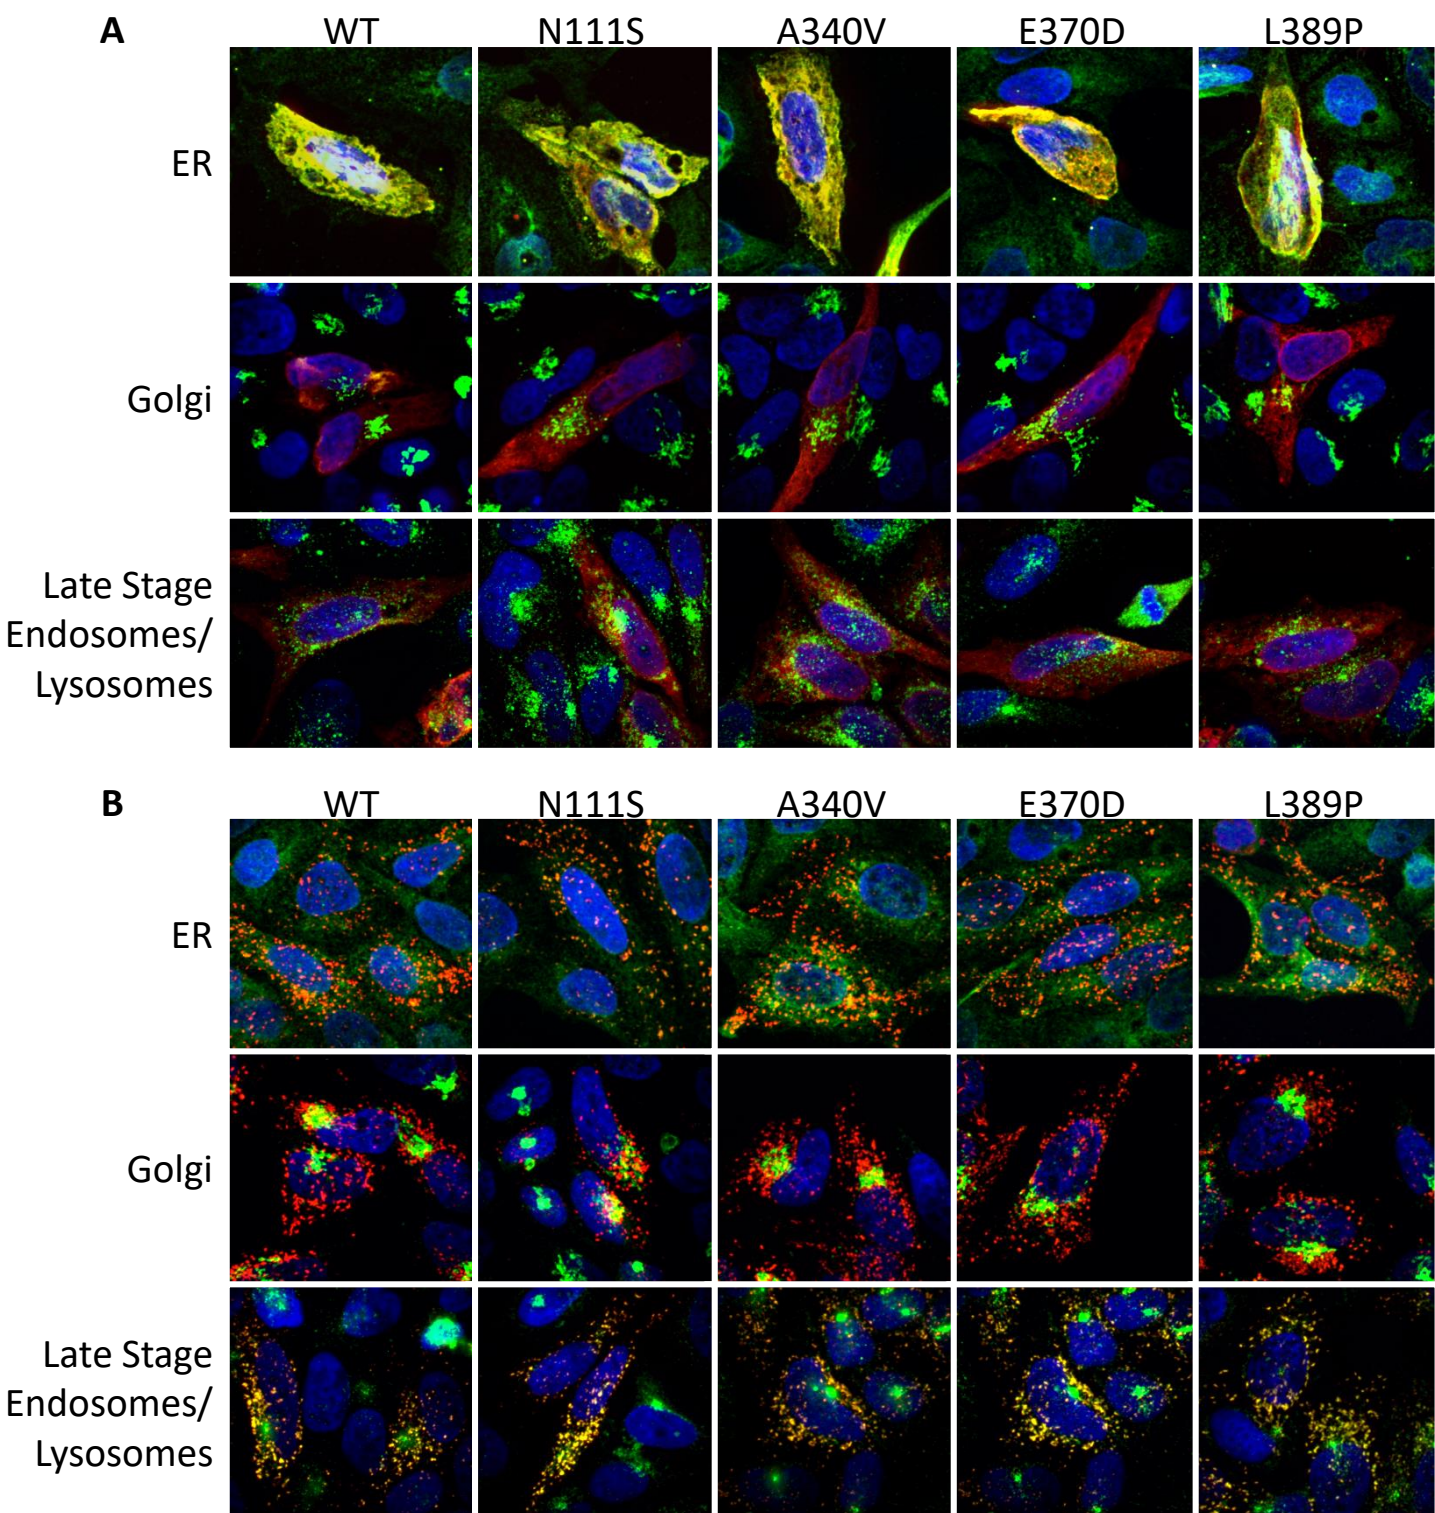

**Supplemental Figure 3. Subcellular colocalization immunofluorescence demonstrates that PMEL variants do not impair trafficking** To confirm that variants do not impair trafficking, a more thorough subcellular colocalization analysis for a subset of variants was undertaken. **(A)** V5-tagged PMEL (red) colocalizes with ER (green, upper panels) and partially with Golgi (green, middle panels), but not endosomal markers (green, bottom panels). No differences between WT PMEL and PDS/PG associated PMEL variants were detected. **(B)** HMB45-reactive mature sialylated PMEL (red) shows correct trafficking to a subset of endosomes (green, bottom panels), and is not retained within the ER (green, top panels) or Golgi (green, middle panels).

**A**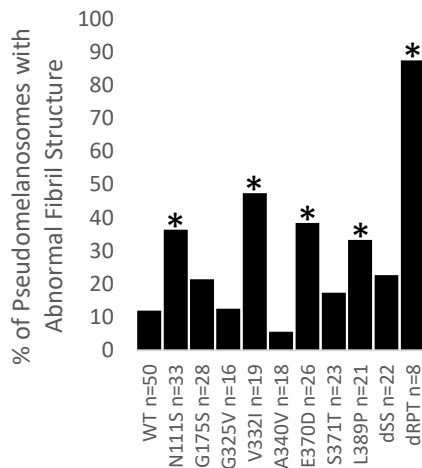**B**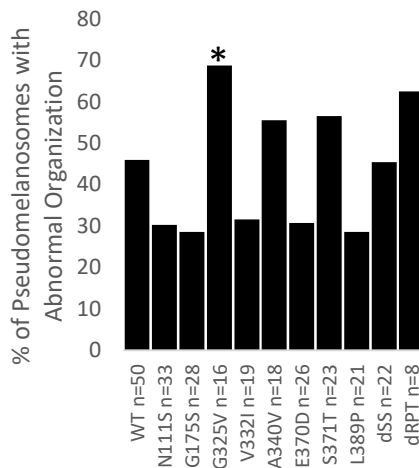**C**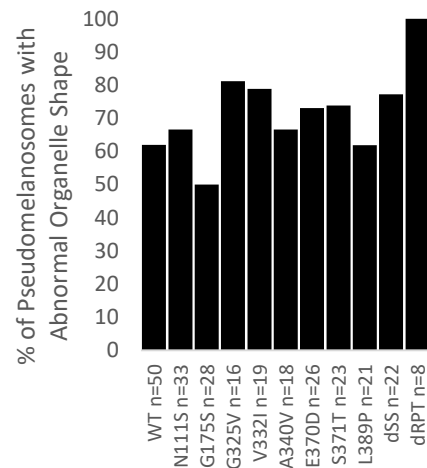

**Supplemental Figure 4. Quantification of ultrastructural defects observed in pseudomelanosomes show four variants with abnormal fibril formation and one variant with abnormal organization.**

Pseudomelanosomes were scored for three features (n=# of pseudomelanosomes scored). Proportion of pseudomelanosomes exhibiting a certain defect were compared using a one-tailed Z-statistic proportion test ( $p < 0.05$ ). **(A)** Pseudomelanosomes were scored for the appearance of abnormal fibrils. PMEL-N111S, -V332I, -E370D, and -L389P contained significantly more pseudomelanosomes with abnormal fibrils ( $p < 0.05$ ). **(B)** Pseudomelanosomes were scored for abnormal fibril organization. Significantly more pseudomelanosomes with abnormal fibril organization were observed for PMEL-G325V than WT ( $p < 0.05$ ). **(C)** Pseudomelanosomes were scored for abnormal organelle shape. No significant difference in the proportion of abnormally shaped pseudomelanosomes between PMEL-WT and PDS/PG associated variants was observed.



**A**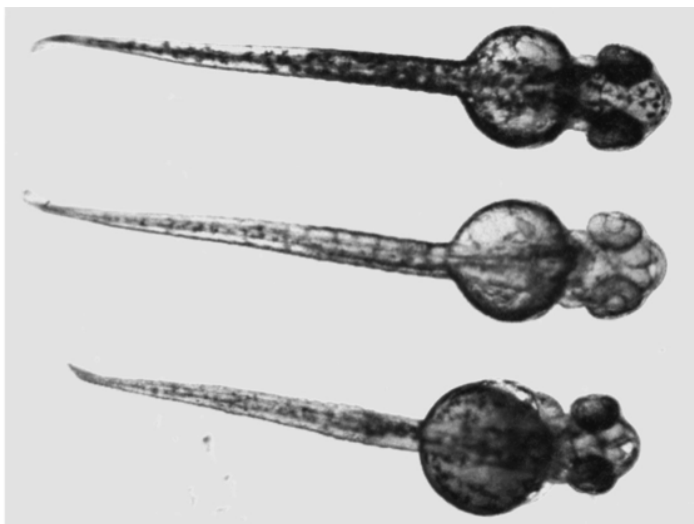

Control MO

*pmela* MO*pmelb* MO**B**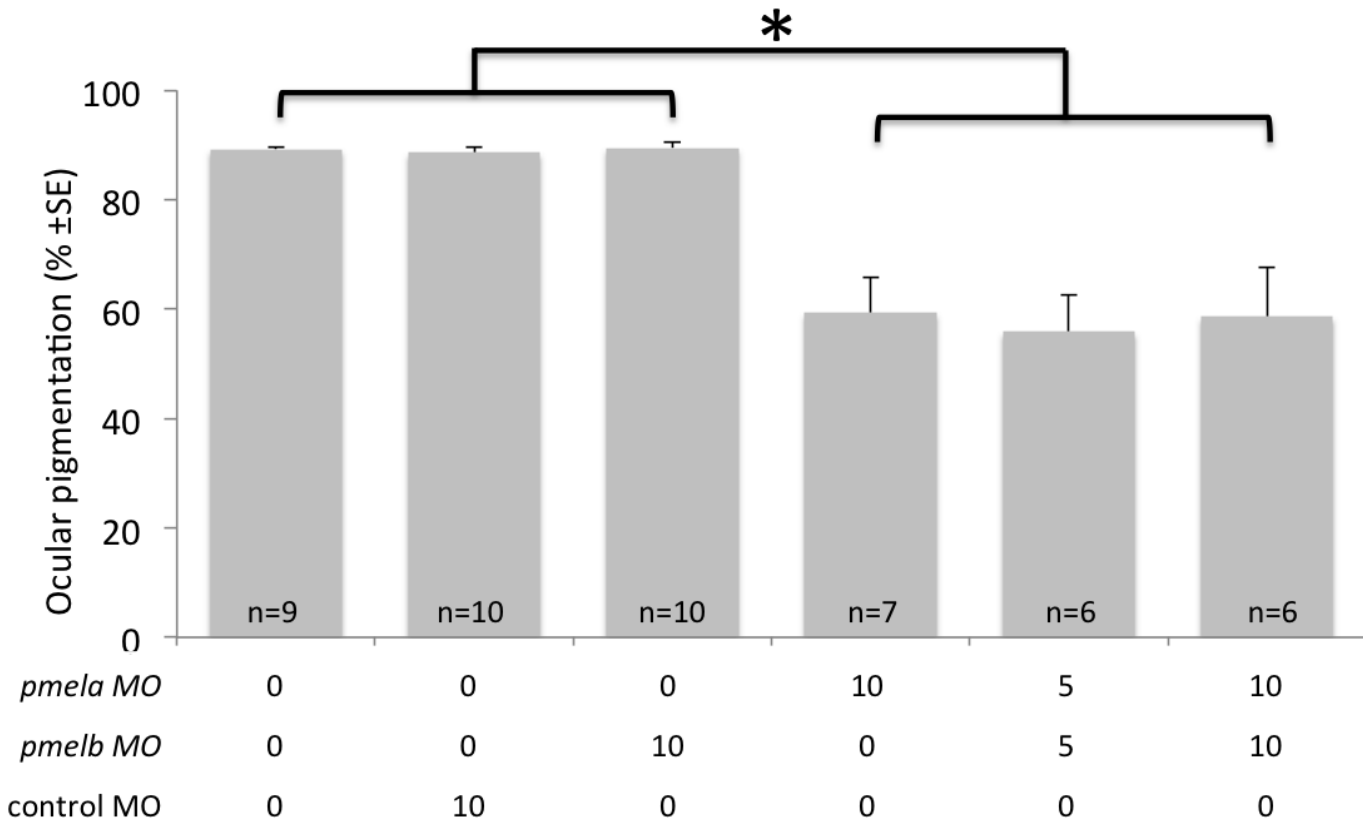

**Supplemental Figure 5. Disrupting homolog of *PMEL* in zebrafish demonstrates its requirement for normal pigmentation *in vivo*.** **A.** Representative images of zebrafish larvae (dorsal view) showing pigmentation levels following morpholino knockdown of *pmela* or *pmelb*. **B.** Quantification of eye pigmentation from dorsal view of zebrafish at 3 days post-fertilization, wherein percent of pixels that are pigmented were quantified. Abscissa reports the morpholino injected and dose in ng per larva. \* indicates all three bars on left are significantly different than all three bars on right at  $p < 0.05$  by ANOVA; sample sizes (n) are number of larvae examined. Similar results were found when whole body pigmentation and/or when 2 days post-fertilization larvae were quantified.

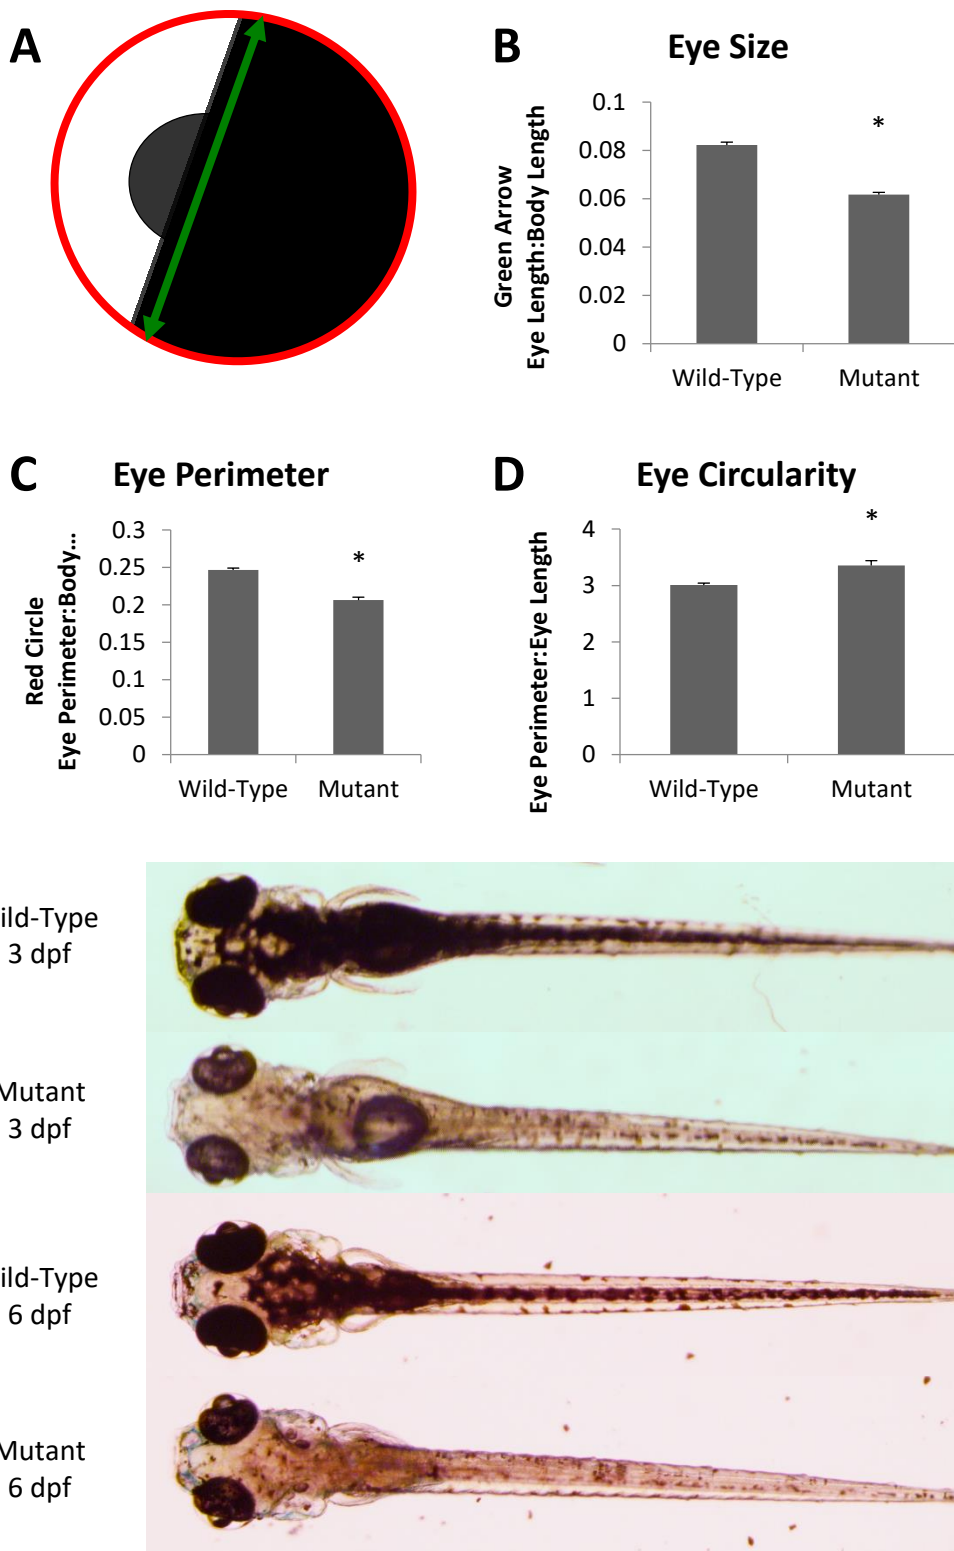

**Supplemental Figure 6.** (A) Schematic of the measurements that were taken of the larval zebrafish eyes where yellow-eye length and red-eye perimeter. (B) Quantification of the eye length to body length ratio in zebrafish larvae. (C) Quantification of the eye perimeter to body length ratio in zebrafish larvae. (D) Quantification of the perimeter to eye length ratio in zebrafish larvae. Sample sizes: pigmented (n=14), abnormally pigmented (n=3). P-value < 0.005 using one tailed t-tests. (E) Larval zebrafish at 3 dpf and 6 dpf without and with the 11-base pair homozygous deletion.

**Supplemental Table 1. Family 2 - Filtered Whole Exome Sequencing Variants**

| Gene            | HGVS cDNA                    | HGVS Protein                       | dbSNP ID    | gnomAD Allele Freq. | Gene Ontology - Biological Process                                                                                                                                                                                                                                                                                                                                                                                                                                                                                                                                                                                                                                                                                                                                                                                                                                                                                                                                                                                                                                                                                                                                         |
|-----------------|------------------------------|------------------------------------|-------------|---------------------|----------------------------------------------------------------------------------------------------------------------------------------------------------------------------------------------------------------------------------------------------------------------------------------------------------------------------------------------------------------------------------------------------------------------------------------------------------------------------------------------------------------------------------------------------------------------------------------------------------------------------------------------------------------------------------------------------------------------------------------------------------------------------------------------------------------------------------------------------------------------------------------------------------------------------------------------------------------------------------------------------------------------------------------------------------------------------------------------------------------------------------------------------------------------------|
| <i>ANKHD1</i>   | NM_017747.2:<br>c.3980C>T    | NP_060217.1:<br>p.Thr1327Met       | n/a         | 0.00001219          | innate immune response                                                                                                                                                                                                                                                                                                                                                                                                                                                                                                                                                                                                                                                                                                                                                                                                                                                                                                                                                                                                                                                                                                                                                     |
| <i>ARHGEF40</i> | NM_018071.4:<br>c.937G>A     | NP_060541.3:<br>p.Gly313Arg        | rs374664276 | 0.0001215           | regulation of Rho protein signal transduction                                                                                                                                                                                                                                                                                                                                                                                                                                                                                                                                                                                                                                                                                                                                                                                                                                                                                                                                                                                                                                                                                                                              |
| <i>GSTA5</i>    | NM_153699.1:<br>c.282G>A     | NP_714543.1:<br>p.Met94Ile         | rs775966246 | 0.00001834          | glutathione metabolic process                                                                                                                                                                                                                                                                                                                                                                                                                                                                                                                                                                                                                                                                                                                                                                                                                                                                                                                                                                                                                                                                                                                                              |
| <i>HCK</i>      | NM_002110.3:<br>c.1049delG   | NP_002101.2:<br>p.Gly350AlafsTer98 | n/a         | n/a                 | cell adhesion; cell differentiation; cytokine-mediated signaling pathway; Fc-gamma receptor signaling pathway involved in phagocytosis; inflammatory response; innate immune response-activating signal transduction; integrin-mediated signaling pathway; interferon-gamma-mediated signaling pathway; leukocyte degranulation; leukocyte migration involved in immune response; lipopolysaccharide-mediated signaling pathway; mesoderm development; negative regulation of apoptotic process; peptidyl-tyrosine autophosphorylation; peptidyl-tyrosine phosphorylation; positive regulation of actin cytoskeleton reorganization; positive regulation of actin filament polymerization; positive regulation of cell proliferation; protein autophosphorylation; protein phosphorylation; regulation of cell shape; regulation of defense response to virus by virus; regulation of inflammatory response; regulation of phagocytosis; regulation of podosome assembly; regulation of sequence-specific DNA binding transcription factor activity; respiratory burst after phagocytosis; transmembrane receptor protein tyrosine kinase signaling pathway; viral process |
| <i>KCNH6</i>    | NM_030779.3:<br>c.263G>T     | NP_110406.1:<br>p.Gly88Val         | n/a         | n/a                 | regulation of membrane potential                                                                                                                                                                                                                                                                                                                                                                                                                                                                                                                                                                                                                                                                                                                                                                                                                                                                                                                                                                                                                                                                                                                                           |
| <i>OR4M1</i>    | NM_001005500.1:<br>c.300G>C  | NP_001005500.1:<br>p.Gln100His     | n/a         | 0.000004061         | detection of chemical stimulus involved in sensory perception; G-protein coupled receptor signaling pathway                                                                                                                                                                                                                                                                                                                                                                                                                                                                                                                                                                                                                                                                                                                                                                                                                                                                                                                                                                                                                                                                |
| <i>PMEL</i>     | NM_001200054.1:<br>c.1019C>T | NP_001186983.1:<br>p.Ala340Val     | rs756974126 | 0.00005796          | developmental pigmentation; melanin biosynthetic process; melanosome organization                                                                                                                                                                                                                                                                                                                                                                                                                                                                                                                                                                                                                                                                                                                                                                                                                                                                                                                                                                                                                                                                                          |
| <i>POLR3E</i>   | NM_001258033.1:<br>c.200C>G  | NP_001244962.1:<br>p.Pro67Arg      | rs368180184 | 0.000004063         | defense response to virus; innate immune response; positive regulation of type I interferon production; transcription from RNA polymerase III promoter                                                                                                                                                                                                                                                                                                                                                                                                                                                                                                                                                                                                                                                                                                                                                                                                                                                                                                                                                                                                                     |
| <i>SLITRK5</i>  | NM_015567.1:<br>c.1616A>G    | NP_056382.1:<br>p.His539Arg        | n/a         | n/a                 | adult behavior; axonogenesis; cardiovascular system development; chemical synaptic transmission; dendrite morphogenesis; grooming behavior; positive regulation of synapse assembly; response to xenobiotic stimulus; skin development; striatum development                                                                                                                                                                                                                                                                                                                                                                                                                                                                                                                                                                                                                                                                                                                                                                                                                                                                                                               |
| <i>SNPH</i>     | NM_014723.3:<br>c.803T>C     | NP_055538.2:<br>p.Val268Ala        | n/a         | n/a                 | brain development; neuron differentiation; neurotransmitter secretion; synaptic vesicle docking                                                                                                                                                                                                                                                                                                                                                                                                                                                                                                                                                                                                                                                                                                                                                                                                                                                                                                                                                                                                                                                                            |
| <i>TESK2</i>    | NM_007170.2:<br>c.1475G>A    | NP_009101.2:<br>p.Arg492Lys        | rs373927435 | 0.00004072          | actin cytoskeleton organization; focal adhesion assembly; intracellular signal transduction; protein phosphorylation;                                                                                                                                                                                                                                                                                                                                                                                                                                                                                                                                                                                                                                                                                                                                                                                                                                                                                                                                                                                                                                                      |

The cDNA and protein notations shown conform to the Human Genome Variation Society (HGVS) recommendations.



**Supplemental Table 2. Primer Sequences for Targeted Resequencing of *PMEL***

| <b>Targeted Region</b> | <b>Primer 1 Sequence (5' → 3')</b> | <b>Primer 2 Sequence (5' → 3')</b> |
|------------------------|------------------------------------|------------------------------------|
| PMEL_ex1               | TCGCTCTTGTCAATTTGGCC               | GACAGTGTCGGGGTATGCTA               |
| PMEL_ex2               | GCAGGATGGGAAAGCAATGT               | CGCCTGAAATATTGCCGCTA               |
| PMEL_ex3               | TGCACTTCGAATGTGAGAATGA             | TCCAGGGAAGTTCAAGGCAA               |
| PMEL_ex4               | GTGGGAGTGGGATGAGGAAA               | AAGTAGAGAAGGAAGGGGCA               |
| PMEL_ex5               | TCTCTGATACCCTGGGAGCA               | TGAGGAAGAGTTGCCAGAAAG              |
| PMEL_ex6               | CCCCATATCACAGCCTTCCA               | TTCCAGTCCATCCAAGCCT                |
| PMEL_ex7.1             | GAGGGTGTGGCTGTGAAAG                | ATGTGGTTCAGAGGGCTC                 |
| PMEL_ex7.2             | AGTTCCAGGCACCACAGATG               | GAACCTCATTCGCACTGATACT             |
| PMEL_ex8               | ATTCCAAGCCTGTGACTCCA               | ATCCCATCCCTGTGCTTTCA               |
| PMEL_ex9,10            | GAGGCCAGGTAGAGGAATCC               | CAGGCATGATAAGCTGGGTG               |
| PMEL_ex10,11           | CCTCAATGTGTCTCTGGCTG               | CCCAGGTCCTACAAGCAAGA               |
| PMEL_ex12              | AGGGGAGGAAGCTAGGATCA               | TGGGATCTGCTAAGTAAGTGGT             |

The Illumina Nextera Transposase Adaptor sequences (5'-TCGTCGGCAGCGTCAGATGTGTATAAGAGACAG-3' and 5'-GTCTCGTGGGCTCGGAGATGTGTATAAGAGACAG-3') were respectively added to the 5' ends of all Primer 1 and Primer 2 sequences.

**Supplemental Table 3. Morpholinos (MOs) used to disrupt zebrafish homologues of PMEL**

| <b>MO Name</b> | <b>Dose</b> | <b>Sequence (5'→3')</b>   | <b>ZFin.org ID</b>   | <b>Reference</b> |
|----------------|-------------|---------------------------|----------------------|------------------|
| <i>pmela</i>   | 10 ng       | GATGAGAGATGTCCACATGATGACC | ZDB-MRPHLNO-150618-3 | 1                |
| <i>pmelb</i>   | 10 ng       | AGGAAACAGTGTTTACTTACTTGTT | n/a                  | Current work     |

---

**Supplemental Table 4. Zebrafish primers**

---

| <b>Sequence Description</b> | <b>Oligonucleotide Sequence</b>                                                            |
|-----------------------------|--------------------------------------------------------------------------------------------|
| CRISPR Binding Sequence     | 5'-GATAACGTGCAAATCGAGTT-3'                                                                 |
| SP6 Promoter                | 5'-ATTTAGGTGACACTATA-3'                                                                    |
| gRNA Backbone               | 5'-GTTTTAGAGCTAGAAATAGCAAG-3'                                                              |
| Constant Oligomer           | 5'-AAAAGCACCGACTCGGTGCCACTTTTTCAAGTTGATAACGGACTAGCC<br>TTATTTTAACTTGCTATTTCTAGCTCTAAAAC-3' |
| PCR Forward Primer          | 5'-CAGGCGGTTTAAGGAGTACCA-3'                                                                |
| PCR Reverse Primer          | 5'-GTGACTGTAGACCAAATAAAGCAG-3'                                                             |
| qPCR Forward Primer         | 5'-GCGACACTCGGAGTTCTGTT-3'                                                                 |
| qPCR Reverse Primer         | 5'-TCACACCACGCGTCCCAGCA-3'                                                                 |

---

**Supplemental Table 5. Non-synonymous PMEL Variants in Controls**

| Protein<br>NP_001186983.1 | Mutation | cDNA<br>NM_001200054.1 | dbSNP ID    | Allele Frequency |                                     | PMEL<br>Domain* |
|---------------------------|----------|------------------------|-------------|------------------|-------------------------------------|-----------------|
|                           |          |                        |             | gnomAD<br>MAF§   | Current Study<br>(# alleles / 1799) |                 |
| p.Leu12Val                | L12V     | c.34T>G                | n/a         | n/a              | 0.0011 (2)                          | Sig             |
| p.Gln30Glu                | Q30E     | c.88C>G                | n/a         | n/a              | 0.0011 (2)                          | NTF             |
| p.Val213Ala               | V213A    | c.638T>C               | n/a         | n/a              | 0.0011 (2)                          | CAF             |
| p.Ile270Leu               | I270L    | c.808A>C               | rs142781578 | n/a              | 0.0006 (1)                          | PKD             |
| p.Pro320Thr               | P320T    | c.958C>A               | n/a         | n/a              | 0.0022 (4)                          | RPT             |
| p.Ser350Phe               | S350F    | c.1049C>T              | rs765152357 | 0.00005426       | 0.0006 (1)                          | RPT             |
| p.Pro354Ser               | P354S    | c.1060C>T              | n/a         | n/a              | 0.0006 (1)                          | RPT             |
| p.Ala362Val               | A362V    | c.1085C>T              | rs1804189   | 0.00003097       | 0.0011 (2)                          | RPT             |
| p.Pro363Ser               | P363S    | c.1087C>T              | rs61752491  | 0.00009290       | 0.0094 (17)                         | RPT             |
| p.Glu370Asp               | E370D    | c.1110G>C              | rs17118154  | 0.00247690       | 0.0100 (18)                         | RPT             |
| p.Leu389Pro               | L389P    | c.1166T>C              | rs142410496 | 0.00075229       | 0.0006 (1)                          | RPT             |
| p.Thr447Met               | T447M    | c.1340C>T              | rs113995172 | 0.00010265       | 0.0033 (6)                          | (gap)           |
| p.Gly505Ser               | G505S    | c.1513G>A              | rs76045902  | 0.00020906       | 0.0094 (17)                         | (gap)           |
| p.Gln556Pro               | Q556P    | c.1667A>C              | rs772472625 | 0.00005289       | 0.0006 (1)                          | Kringle         |
| p.Ser562Leu               | S562L    | c.1685C>T              | rs148206928 | 0.00002326       | 0.0006 (1)                          | Kringle         |
| p.Val603Ala               | V603A    | c.1808T>C              | rs57990974  | 0.00020126       | 0.0094 (17)                         | TM              |

Non-synonymous PMEL variants identified during exome analysis of 1799 ophthalmologically-examined controls. The cDNA and protein notations shown conform to the Human Genome Variation Society (HGVS) recommendations. gnomAD, Genome Aggregation Database; MAF, minor allele frequency; PDS, pigmentary dispersion syndrome; PG, pigmentary glaucoma. §European (Non-Finnish) MAF. \*See Figure 2 for PMEL protein domain structure and abbreviations.
